# Supplementary material
Source: Royal Society of Chemistry journal article supplement (https://www.rsc.org/suppdata/cp/1999/3395/pdf2.pdf)
Supplement: Supplementary file 1 [file pdf2.pdf]

TABLES

TABLE I. Rovibrational energies (in  $\text{cm}^{-1}$ ) relative to  $O_2(^1\Delta_g)_{v=0} + O_2(^1\Delta_g)_{v=0}$  for the  $K = 0$  states of symmetry  $A_1^+$

| J=0      | J=1      | J=2      | J=3      | J=4      | J=5      | J=6      | $B_p = \frac{B+C}{2}$ |
|----------|----------|----------|----------|----------|----------|----------|-----------------------|
| -23.8998 |          | -23.5393 |          | -22.6988 |          | -21.3797 | .0600                 |
| -22.7724 |          | -22.4139 |          | -21.5781 |          | -20.2664 | .0597                 |
| -21.2466 |          | -20.8980 |          | -20.0852 |          | -18.8097 | .0581                 |
| -13.8509 |          | -13.4967 |          | -12.6709 |          | -11.3748 | .0590                 |
| -12.8636 |          | -12.5132 |          | -11.6962 |          | -10.4138 | .0584                 |
| -5.8321  |          | -5.4790  |          | -4.6556  |          | -3.3634  | .0588                 |
| -5.4503  |          | -5.0967  |          | -4.2723  |          | -2.9783  | .0589                 |
| -4.9749  |          | -4.6319  |          | -3.8321  |          | -2.5764  | .0571                 |
| -4.6750  |          | -4.3232  |          | -3.5027  |          | -2.2147  | .0586                 |
| -3.7248  |          | -3.3833  |          | -2.5869  |          | -1.3363  | .0569                 |
| -3.2803  |          | -2.9287  |          | -2.1087  |          | -.8215   | .0586                 |
| -2.2715  |          | -1.9229  |          | -1.1099  |          |          | .0581                 |
| -1.7117  |          | -1.3667  |          | -.5625   |          |          | .0574                 |
| -.7008   |          | -.3576   |          |          |          |          | .0572                 |
| -.1263   |          |          |          |          |          |          | .0578                 |
|          | -14.6544 |          | -14.0603 |          | -12.9920 |          | .0594                 |
|          | -13.3399 |          | -12.7517 |          | -11.6940 |          | .0588                 |
|          | -12.7294 |          | -12.1407 |          | -11.0818 |          | .0589                 |
|          | -1.9785  |          | -1.3900  |          | -.3316   |          | .0588                 |
|          | -.8183   |          | -.2340   |          |          |          | .0584                 |

TABLE II. Rovibrational energies (in  $\text{cm}^{-1}$ ) relative to  $O_2(^1\Delta_g)_{v=0} + O_2(^1\Delta_g)_{v=0}$  for the  $K = 0$  states of symmetry  $B_1^-$

| J=0      | J=1      | J=2      | J=3      | J=4      | J=5      | J=6      | $B_p = \frac{B+C}{2}$ |
|----------|----------|----------|----------|----------|----------|----------|-----------------------|
| -23.1393 |          | -22.7808 |          | -21.9450 |          | -20.6332 | .0597                 |
| -21.2503 |          | -20.9018 |          | -20.0890 |          | -18.8135 | .0581                 |
| -14.5252 |          | -14.1692 |          | -13.3390 |          | -12.0360 | .0593                 |
| -13.4282 |          | -13.0736 |          | -12.2469 |          | -10.9496 | .0591                 |
| -12.8295 |          | -12.4784 |          | -11.6596 |          | -10.3740 | .0585                 |
| -5.7460  |          | -5.3924  |          | -4.5677  |          | -3.2734  | .0589                 |
| -5.1482  |          | -4.7953  |          | -3.9724  |          | -2.6808  | .0588                 |
| -4.0647  |          | -3.7140  |          | -2.9009  |          | -1.6431  | .0581                 |
| -4.0222  |          | -3.6797  |          | -2.8764  |          | -1.5964  | .0574                 |
| -1.9500  |          | -1.6036  |          | -.7959   |          |          | .0577                 |
| -1.2182  |          | -.8740   |          | -.0713   |          |          | .0573                 |
| -.3259   |          |          |          |          |          |          | .0571                 |
|          | -13.9354 |          | -13.3440 |          | -12.2807 |          | .0591                 |
|          | -12.9596 |          | -12.3741 |          | -11.3213 |          | .0585                 |
|          | -2.7802  |          | -2.1885  |          | -1.1244  |          | .0592                 |
|          | -1.3501  |          | -.7633   |          |          |          | .0587                 |
|          | -.6207   |          | -.0336   |          |          |          | .0587                 |

TABLE III. Rovibrational energies (in  $\text{cm}^{-1}$ ) relative to  $O_2(^1\Delta_g)_{v=0} + O_2(^1\Delta_g)_{v=0}$  for the  $K = 1$  states of symmetry  $A_1^+$

| J=1      | J=2      | J=3      | J=4      | J=5      | J=6      | $B_p = \frac{B+C}{2}$ |
|----------|----------|----------|----------|----------|----------|-----------------------|
| -23.0346 | -22.7952 | -22.4362 | -21.9578 | -21.3603 | -20.6438 | .0598                 |
| -22.0763 | -21.8404 | -21.4866 | -21.0152 | -20.4262 | -19.7201 | .0589                 |
| -14.6212 | -14.3837 | -14.0277 | -13.5531 | -12.9603 | -12.2494 | .0593                 |
| -13.9156 | -13.6790 | -13.3241 | -12.8513 | -12.2606 | -11.5523 | .0591                 |
| -13.4633 | -13.2279 | -12.8749 | -12.4045 | -11.8168 | -11.1122 | .0588                 |
| -13.0862 | -12.8507 | -12.4977 | -12.0272 | -11.4394 | -10.7346 | .0588                 |
| -12.5603 | -12.3260 | -11.9747 | -11.5066 | -10.9218 | -10.2204 | .0585                 |
| -5.5016  | -5.2664  | -4.9136  | -4.4434  | -3.8560  | -3.1517  | .0588                 |
| -4.6814  | -4.4465  | -4.0943  | -3.6249  | -3.0385  | -2.3353  | .0587                 |
| -3.9763  | -3.7488  | -3.4076  | -2.9528  | -2.3845  | -1.7028  | .0569                 |
| -3.3071  | -3.0725  | -2.7207  | -2.2518  | -1.6661  | -.9637   | .0586                 |
| -2.9707  | -2.7365  | -2.3855  | -1.9183  | -1.3355  | -.6382   | .0585                 |
| -2.7483  | -2.5183  | -2.1732  | -1.7127  | -1.1365  | -.4440   | .0575                 |
| -2.0122  | -1.7785  | -1.4279  | -.9607   | -.3767   |          | .0584                 |
| -1.3225  | -1.0885  | -.7377   | -.2701   |          |          | .0585                 |
| -.8409   | -.6078   | -.2581   |          |          |          | .0583                 |

TABLE IV. Rovibrational energies (in  $\text{cm}^{-1}$ ) relative to  $O_2(^1\Delta_g)_{v=0} + O_2(^1\Delta_g)_{v=0}$  for the  $K = 1$  states of symmetry  $B_1^-$

| J=1      | J=2      | J=3      | J=4      | J=5      | J=6      | $B_p = \frac{B+C}{2}$ |
|----------|----------|----------|----------|----------|----------|-----------------------|
| -23.7009 | -23.4611 | -23.1017 | -22.6226 | -22.0241 | -21.3065 | .0599                 |
| -22.1463 | -21.9106 | -21.5571 | -21.0861 | -20.4976 | -19.7920 | .0589                 |
| -14.6849 | -14.4473 | -14.0911 | -13.6164 | -13.0234 | -12.3123 | .0594                 |
| -14.0115 | -13.7749 | -13.4201 | -12.9474 | -12.3568 | -11.6486 | .0591                 |
| -13.4220 | -13.1854 | -12.8305 | -12.3576 | -11.7669 | -11.0587 | .0591                 |
| -13.2279 | -12.9930 | -12.6408 | -12.1713 | -11.5848 | -10.8814 | .0587                 |
| -12.6420 | -12.4079 | -12.0570 | -11.5893 | -11.0050 | -10.3044 | .0585                 |
| -5.6804  | -5.4453  | -5.0927  | -4.6228  | -4.0358  | -3.3318  | .0588                 |
| -5.1330  | -4.8978  | -4.5451  | -4.0751  | -3.4880  | -2.7839  | .0588                 |
| -4.7357  | -4.5073  | -4.1647  | -3.7081  | -3.1375  | -2.4531  | .0571                 |
| -4.0598  | -3.8251  | -3.4731  | -3.0040  | -2.4180  | -1.7153  | .0586                 |
| -2.9571  | -2.7270  | -2.3821  | -1.9226  | -1.3489  | -.6614   | .0575                 |
| -2.4484  | -2.2171  | -1.8700  | -1.4071  | -.8284   | -.1337   | .0579                 |
| -1.8627  | -1.6289  | -1.2782  | -.8108   | -.2268   |          | .0584                 |
| -1.4910  | -1.2567  | -.9054   | -.4372   |          |          | .0585                 |
| -.9903   | -.7551   | -.4023   |          |          |          | .0588                 |
| -.1784   |          |          |          |          |          | .0578                 |

TABLE V. Rovibrational energies (in  $\text{cm}^{-1}$ ) relative to  $O_2(^1\Delta_g)_{v=0} + O_2(^1\Delta_g)_{v=0}$  for the  $K = 2$  states of symmetry  $A_1^+$

| J=2      | J=3      | J=4      | J=5      | J=6      | $B_p = \frac{B+C}{2}$ |
|----------|----------|----------|----------|----------|-----------------------|
| -23.2158 | -22.8583 | -22.3819 | -21.7868 | -21.0733 | .0595                 |
| -22.1587 | -21.8034 | -21.3298 | -20.7383 | -20.0290 | .0592                 |
| -14.6278 | -14.2714 | -13.7965 | -13.2033 | -12.4919 | .0594                 |
| -14.1319 | -13.7760 | -13.3016 | -12.7089 | -11.9983 | .0593                 |
| -13.4376 | -13.0826 | -12.6096 | -12.0188 | -11.3102 | .0591                 |
| -12.4212 | -12.0703 | -11.6026 | -11.0183 | -10.3177 | .0585                 |
| -5.5411  | -5.1884  | -4.7183  | -4.1310  | -3.4268  | .0588                 |
| -4.7621  | -4.4092  | -3.9390  | -3.3515  | -2.6471  | .0588                 |
| -4.1927  | -3.8496  | -3.3923  | -2.8211  | -2.1360  | .0572                 |
| -3.4572  | -3.1053  | -2.6363  | -2.0504  | -1.3478  | .0586                 |
| -3.1180  | -2.7688  | -2.3039  | -1.7240  | -1.0299  | .0581                 |
| -2.8577  | -2.5132  | -2.0533  | -1.4778  | -.7860   | .0575                 |
| -2.3202  | -1.9677  | -1.4978  | -.9106   | -.2065   | .0587                 |
| -1.8416  | -1.4884  | -1.0177  | -.4295   |          | .0588                 |
| -1.1146  | -.7639   | -.2966   |          |          | .0584                 |

TABLE VI. Rovibrational energies (in  $\text{cm}^{-1}$ ) relative to  $O_2(^1\Delta_g)_{v=0} + O_2(^1\Delta_g)_{v=0}$  for the  $K = 2$  states of symmetry  $B_1^-$

| J=2      | J=3      | J=4      | J=5      | J=6      | $B_p = \frac{B+C}{2}$ |
|----------|----------|----------|----------|----------|-----------------------|
| -22.4772 | -22.1221 | -21.6488 | -21.0577 | -20.3488 | .0592                 |
| -14.7423 | -14.3855 | -13.9101 | -13.3161 | -12.6039 | .0594                 |
| -14.0185 | -13.6626 | -13.1882 | -12.5956 | -11.8850 | .0593                 |
| -13.5292 | -13.1738 | -12.7001 | -12.1083 | -11.3988 | .0592                 |
| -12.5666 | -12.2156 | -11.7478 | -11.1635 | -10.4628 | .0585                 |
| -5.2198  | -4.8667  | -4.3961  | -3.8082  | -3.1033  | .0588                 |
| -4.1706  | -3.8182  | -3.3486  | -2.7619  | -2.0583  | .0587                 |
| -3.3730  | -3.0264  | -2.5651  | -1.9895  | -1.3004  | .0577                 |
| -3.0194  | -2.6706  | -2.2051  | -1.6226  | -.9229   | .0582                 |
| -2.4530  | -2.0988  | -1.6267  | -1.0369  | -.3298   | .0590                 |
| -1.9752  | -1.6213  | -1.1497  | -.5605   |          | .0590                 |
| -1.2695  | -.9162   | -.4452   |          |          | .0589                 |
| -.0643   |          |          |          |          | .0578                 |

TABLE VII. Rovibrational energies (in  $\text{cm}^{-1}$ ) relative to  $O_2(^1\Delta_g)_{v=0} + O_2(^1\Delta_g)_{v=1}$  for the  $K = 0$  states of symmetry  $A_1^+$

| J=0      | J=1      | J=2      | J=3      | J=4      | J=5      | J=6      | $B_p = \frac{B+C}{2}$ |
|----------|----------|----------|----------|----------|----------|----------|-----------------------|
| -24.0024 |          | -23.6419 |          | -22.8014 |          | -21.4823 | .0600                 |
| -22.8750 |          | -22.5165 |          | -21.6807 |          | -20.3690 | .0597                 |
| -21.3492 |          | -21.0006 |          | -20.1878 |          | -18.9123 | .0581                 |
| -13.9558 |          | -13.6016 |          | -12.7757 |          | -11.4796 | .0590                 |
| -12.9700 |          | -12.6196 |          | -11.8025 |          | -10.5199 | .0584                 |
| -6.0332  |          | -5.6801  |          | -4.8567  |          | -3.5644  | .0588                 |
| -5.6543  |          | -5.3007  |          | -4.4763  |          | -3.1823  | .0589                 |
| -5.0836  |          | -4.7402  |          | -3.9397  |          | -2.6833  | .0572                 |
| -4.8702  |          | -4.5188  |          | -3.6991  |          | -2.4119  | .0586                 |
| -3.8317  |          | -3.4900  |          | -2.6931  |          | -1.4422  | .0569                 |
| -3.4801  |          | -3.1287  |          | -2.3092  |          | -1.0225  | .0585                 |
| -2.3755  |          | -2.0269  |          | -1.2139  |          |          | .0581                 |
| -1.8154  |          | -1.4705  |          | -.6662   |          |          | .0575                 |
| -.8045   |          | -.4614   |          |          |          |          | .0572                 |
| -.2306   |          |          |          |          |          |          | .0578                 |
|          | -14.7571 |          | -14.1630 |          | -13.0947 |          | .0594                 |
|          | -13.4425 |          | -12.8543 |          | -11.7967 |          | .0588                 |
|          | -12.8321 |          | -12.2434 |          | -11.1845 |          | .0589                 |
|          | -2.0825  |          | -1.4939  |          | -.4355   |          | .0588                 |
|          | -.9227   |          | -.3383   |          |          |          | .0584                 |

TABLE VIII. Rovibrational energies (in  $\text{cm}^{-1}$ ) relative to  $O_2(^1\Delta_g)_{v=0} + O_2(^1\Delta_g)_{v=1}$  for the  $K = 0$  states of symmetry  $B_1^-$

| J=0      | J=1      | J=2      | J=3      | J=4      | J=5      | J=6      | $B_p = \frac{B+C}{2}$ |
|----------|----------|----------|----------|----------|----------|----------|-----------------------|
| -23.2418 |          | -22.8834 |          | -22.0475 |          | -20.7358 | .0597                 |
| -21.3529 |          | -21.0044 |          | -20.1916 |          | -18.9161 | .0581                 |
| -14.6288 |          | -14.2727 |          | -13.4425 |          | -12.1395 | .0593                 |
| -13.5327 |          | -13.1781 |          | -12.3513 |          | -11.0539 | .0591                 |
| -12.9356 |          | -12.5844 |          | -11.7655 |          | -10.4798 | .0585                 |
| -5.9488  |          | -5.5951  |          | -4.7705  |          | -3.4762  | .0589                 |
| -5.3495  |          | -4.9967  |          | -4.1739  |          | -2.8823  | .0588                 |
| -4.2632  |          | -3.9114  |          | -3.0910  |          | -1.8039  | .0586                 |
| -4.1279  |          | -3.7866  |          | -2.9905  |          | -1.7399  | .0569                 |
| -2.0541  |          | -1.7077  |          | -.9000   |          |          | .0577                 |
| -1.3217  |          | -.9775   |          | -.1748   |          |          | .0573                 |
| -.4300   |          | -.0874   |          |          |          |          | .0571                 |
|          | -14.0381 |          | -13.4467 |          | -12.3834 |          | .0591                 |
|          | -13.0622 |          | -12.4768 |          | -11.4239 |          | .0585                 |
|          | -2.8834  |          | -2.2916  |          | -1.2275  |          | .0592                 |
|          | -1.4541  |          | -.8672   |          |          |          | .0587                 |
|          | -.7244   |          | -.1373   |          |          |          | .0587                 |



TABLE IX. Rovibrational energies (in  $\text{cm}^{-1}$ ) relative to  $O_2(^1\Delta_g)_{v=0} + O_2(^1\Delta_g)_{v=1}$  for the  $K = 0$  states of symmetry  $A_2^-$

| J=0      | J=1      | J=2      | J=3      | J=4      | J=5      | J=6      | $B_p = \frac{B+C}{2}$ |
|----------|----------|----------|----------|----------|----------|----------|-----------------------|
| -14.8760 |          | -14.5194 |          | -13.6880 |          | -12.3832 | .0594                 |
| -13.5602 |          | -13.2072 |          | -12.3841 |          | -11.0924 | .0588                 |
| -12.9499 |          | -12.5966 |          | -11.7726 |          | -10.4792 | .0589                 |
| -2.2002  |          | -1.8470  |          | -1.0233  |          |          | .0588                 |
| -1.0396  |          | -.6889   |          |          |          |          | .0584                 |
|          | -23.8822 |          | -23.2816 |          | -22.2015 |          | .0600                 |
|          | -22.7555 |          | -22.1582 |          | -21.0842 |          | .0597                 |
|          | -21.2330 |          | -20.6522 |          | -19.6078 |          | .0581                 |
|          | -13.8377 |          | -13.2476 |          | -12.1863 |          | .0590                 |
|          | -12.8532 |          | -12.2693 |          | -11.2193 |          | .0584                 |
|          | -5.9155  |          | -5.3271  |          | -4.2691  |          | .0588                 |
|          | -5.5364  |          | -4.9473  |          | -3.8879  |          | .0589                 |
|          | -4.9691  |          | -4.3970  |          | -3.3684  |          | .0572                 |
|          | -4.7530  |          | -4.1674  |          | -3.1139  |          | .0586                 |
|          | -3.7178  |          | -3.1484  |          | -2.1243  |          | .0569                 |
|          | -3.3630  |          | -2.7774  |          | -1.7242  |          | .0585                 |
|          | -2.2593  |          | -1.6784  |          | -.6334   |          | .0581                 |
|          | -1.7004  |          | -1.1257  |          | -.0923   |          | .0575                 |
|          | -.6901   |          | -.1183   |          |          |          | .0572                 |
|          | -.1149   |          |          |          |          |          | .0578                 |

TABLE X. Rovibrational energies (in  $\text{cm}^{-1}$ ) relative to  $O_2(^1\Delta_g)_{v=0} + O_2(^1\Delta_g)_{v=1}$  for the  $K = 0$  states of symmetry  $B_2^+$

| J=0      | J=1      | J=2      | J=3      | J=4      | J=5      | J=6      | $B_p = \frac{B+C}{2}$ |
|----------|----------|----------|----------|----------|----------|----------|-----------------------|
| -14.1564 |          | -13.8015 |          | -12.9740 |          | -11.6753 | .0591                 |
| -13.1794 |          | -12.8280 |          | -12.0087 |          | -10.7226 | .0585                 |
| -3.0018  |          | -2.6466  |          | -1.8185  |          | -.5188   | .0592                 |
| -1.5716  |          | -1.2193  |          | -.3980   |          |          | .0587                 |
| -.8419   |          | -.4895   |          |          |          |          | .0587                 |
|          | -23.1223 |          | -22.5251 |          | -21.4510 |          | .0597                 |
|          | -21.2367 |          | -20.6559 |          | -19.6116 |          | .0581                 |
|          | -14.5101 |          | -13.9168 |          | -12.8500 |          | .0593                 |
|          | -13.4144 |          | -12.8236 |          | -11.7613 |          | .0591                 |
|          | -12.8185 |          | -12.2334 |          | -11.1809 |          | .0585                 |
|          | -5.8309  |          | -5.2416  |          | -4.1819  |          | .0589                 |
|          | -5.2319  |          | -4.6440  |          | -3.5866  |          | .0588                 |
|          | -4.1459  |          | -3.5597  |          | -2.5056  |          | .0586                 |
|          | -4.0141  |          | -3.4454  |          | -2.4221  |          | .0569                 |
|          | -1.9387  |          | -1.3614  |          | -.3235   |          | .0577                 |
|          | -1.2069  |          | -.6334   |          |          |          | .0573                 |
|          | -.3158   |          |          |          |          |          | .0571                 |

TABLE XI. Rovibrational energies (in  $\text{cm}^{-1}$ ) relative to  $O_2(^1\Delta_g)_{v=0} + O_2(^1\Delta_g)_{v=1}$  for the  $K = 1$  states of symmetries  $A_1^+$  and  $A_2^-$

| J=1      | J=2      | J=3      | J=4      | J=5      | J=6      | $B_p = \frac{B+C}{2}$ |
|----------|----------|----------|----------|----------|----------|-----------------------|
| -23.1372 | -22.8978 | -22.5388 | -22.0604 | -21.4628 | -20.7463 | .0598                 |
| -22.1789 | -21.9429 | -21.5892 | -21.1178 | -20.5288 | -19.8226 | .0589                 |
| -14.7244 | -14.4870 | -14.1309 | -13.6563 | -13.0635 | -12.3526 | .0593                 |
| -14.0187 | -13.7821 | -13.4273 | -12.9544 | -12.3637 | -11.6554 | .0591                 |
| -13.5678 | -13.3324 | -12.9793 | -12.5089 | -11.9212 | -11.2166 | .0588                 |
| -13.1904 | -12.9550 | -12.6019 | -12.1314 | -11.5436 | -10.8387 | .0588                 |
| -12.6646 | -12.4303 | -12.0790 | -11.6108 | -11.0260 | -10.3246 | .0585                 |
| -5.7027  | -5.4674  | -5.1147  | -4.6445  | -4.0572  | -3.3529  | .0588                 |
| -4.8809  | -4.6460  | -4.2937  | -3.8243  | -3.2378  | -2.5346  | .0587                 |
| -4.0811  | -3.8536  | -3.5124  | -3.0576  | -2.4894  | -1.8078  | .0569                 |
| -3.5087  | -3.2741  | -2.9223  | -2.4534  | -1.8677  | -1.1653  | .0586                 |
| -3.0744  | -2.8401  | -2.4892  | -2.0220  | -1.4392  | -.7420   | .0584                 |
| -2.8518  | -2.6218  | -2.2766  | -1.8161  | -1.2399  | -.5474   | .0575                 |
| -2.1162  | -1.8824  | -1.5319  | -1.0646  | -.4807   |          | .0584                 |
| -1.4267  | -1.1927  | -.8418   | -.3742   |          |          | .0585                 |
| -.9452   | -.7120   | -.3624   |          |          |          | .0583                 |
| -.1020   |          |          |          |          |          | .0579                 |

TABLE XII. Rovibrational energies (in  $\text{cm}^{-1}$ ) relative to  $O_2(^1\Delta_g)_{v=0} + O_2(^1\Delta_g)_{v=1}$  for the  $K = 1$  states of symmetries  $B_1^-$  and  $B_2^+$

| J=1      | J=2      | J=3      | J=4      | J=5      | J=6      | $B_p = \frac{B+C}{2}$ |
|----------|----------|----------|----------|----------|----------|-----------------------|
| -23.8035 | -23.5637 | -23.2042 | -22.7251 | -22.1267 | -21.4090 | .0599                 |
| -22.2489 | -22.0132 | -21.6597 | -21.1886 | -20.6002 | -19.8945 | .0589                 |
| -14.7878 | -14.5503 | -14.1941 | -13.7193 | -13.1263 | -12.4152 | .0594                 |
| -14.1156 | -13.8791 | -13.5243 | -13.0515 | -12.4609 | -11.7528 | .0591                 |
| -13.5254 | -13.2888 | -12.9339 | -12.4610 | -11.8703 | -11.1621 | .0591                 |
| -13.3322 | -13.0972 | -12.7449 | -12.2754 | -11.6889 | -10.9855 | .0587                 |
| -12.7468 | -12.5127 | -12.1618 | -11.6940 | -11.1097 | -10.4090 | .0585                 |
| -5.8815  | -5.6464  | -5.2938  | -4.8239  | -4.2369  | -3.5329  | .0588                 |
| -5.3334  | -5.0982  | -4.7454  | -4.2753  | -3.6881  | -2.9839  | .0588                 |
| -4.8408  | -4.6125  | -4.2700  | -3.8134  | -3.2430  | -2.5589  | .0571                 |
| -4.2611  | -4.0264  | -3.6745  | -3.2054  | -2.6194  | -1.9168  | .0586                 |
| -3.0602  | -2.8301  | -2.4852  | -2.0257  | -1.4520  | -.7644   | .0575                 |
| -2.5518  | -2.3204  | -1.9734  | -1.5105  | -.9318   | -.2371   | .0578                 |
| -1.9670  | -1.7331  | -1.3824  | -.9150   | -.3310   |          | .0584                 |
| -1.5952  | -1.3609  | -1.0096  | -.5414   |          |          | .0585                 |
| -1.0938  | -.8585   | -.5057   | -.0356   |          |          | .0588                 |
| -.2832   | -.0518   |          |          |          |          | .0578                 |

TABLE XIII. Rovibrational energies (in  $\text{cm}^{-1}$ ) relative to  $O_2(^1\Delta_g)_{v=0} + O_2(^1\Delta_g)_{v=1}$  for the  $K = 2$  states of symmetries  $A_1^+$  and  $A_2^-$

| J=2      | J=3      | J=4      | J=5      | J=6      | $B_p = \frac{B+C}{2}$ |
|----------|----------|----------|----------|----------|-----------------------|
| -23.3184 | -22.9609 | -22.4845 | -21.8894 | -21.1759 | .0595                 |
| -22.2613 | -21.9059 | -21.4324 | -20.8409 | -20.1316 | .0592                 |
| -14.7309 | -14.3745 | -13.8997 | -13.3064 | -12.5950 | .0594                 |
| -14.2359 | -13.8799 | -13.4055 | -12.8128 | -12.1022 | .0593                 |
| -13.5414 | -13.1865 | -12.7135 | -12.1226 | -11.4140 | .0591                 |
| -12.5258 | -12.1749 | -11.7072 | -11.1229 | -10.4223 | .0585                 |
| -5.7431  | -5.3904  | -4.9203  | -4.3331  | -3.6289  | .0588                 |
| -4.9634  | -4.6105  | -4.1402  | -3.5527  | -2.8483  | .0588                 |
| -4.2968  | -3.9537  | -3.4965  | -2.9253  | -2.2404  | .0572                 |
| -3.6583  | -3.3064  | -2.8374  | -2.2515  | -1.5489  | .0586                 |
| -3.2222  | -2.8730  | -2.4081  | -1.8282  | -1.1341  | .0581                 |
| -2.9609  | -2.6163  | -2.1565  | -1.5810  | -.8892   | .0575                 |
| -2.4244  | -2.0718  | -1.6019  | -1.0147  | -.3106   | .0587                 |
| -1.9455  | -1.5923  | -1.1215  | -.5334   |          | .0588                 |
| -1.2188  | -.8681   | -.4007   |          |          | .0584                 |

TABLE XIV. Rovibrational energies (in  $\text{cm}^{-1}$ ) relative to  $O_2(^1\Delta_g)_{v=0} + O_2(^1\Delta_g)_{v=1}$  for the  $K = 2$  states of symmetries  $B_1^-$  and  $B_2^+$

| J=2      | J=3      | J=4      | J=5      | J=6      | $B_p = \frac{B+C}{2}$ |
|----------|----------|----------|----------|----------|-----------------------|
| -22.5798 | -22.2246 | -21.7514 | -21.1602 | -20.4514 | .0592                 |
| -14.8453 | -14.4885 | -14.0130 | -13.4191 | -12.7068 | .0594                 |
| -14.1218 | -13.7658 | -13.2914 | -12.6988 | -11.9883 | .0593                 |
| -13.6322 | -13.2767 | -12.8030 | -12.2113 | -11.5017 | .0592                 |
| -12.6713 | -12.3203 | -11.8525 | -11.2681 | -10.5674 | .0585                 |
| -5.4223  | -5.0693  | -4.5987  | -4.0109  | -3.3060  | .0588                 |
| -4.3727  | -4.0204  | -3.5507  | -2.9640  | -2.2605  | .0587                 |
| -3.4761  | -3.1295  | -2.6681  | -2.0926  | -1.4034  | .0577                 |
| -3.1226  | -2.7738  | -2.3083  | -1.7259  | -1.0262  | .0582                 |
| -2.5572  | -2.2029  | -1.7308  | -1.1410  | -.4338   | .0590                 |
| -2.0793  | -1.7254  | -1.2538  | -.6646   |          | .0590                 |
| -1.3730  | -1.0196  | -.5486   |          |          | .0589                 |
| -.1692   |          |          |          |          | .0578                 |
